# Supplementary material
Source: Springer Nature journal article supplement (https://www.springermedizin.de/resource/supplementary/12936_2010_1250_MOESM2_ESM.pdf/9549326)

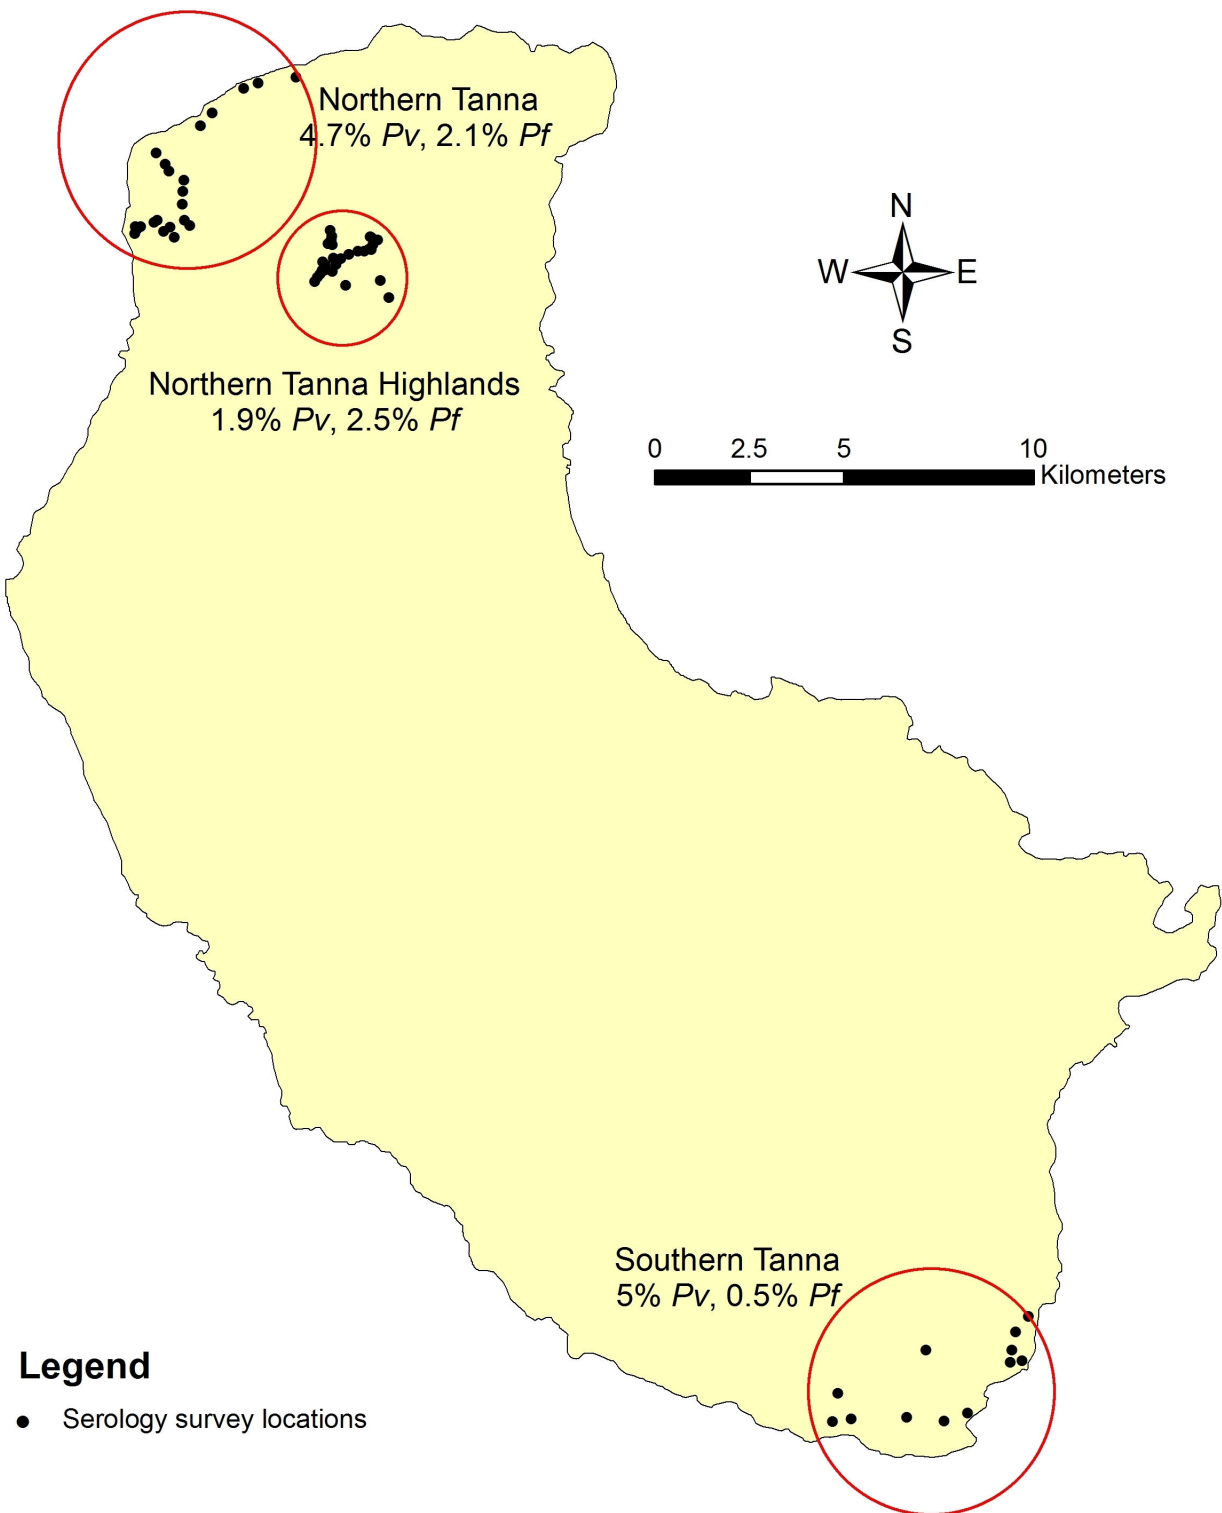

Supplement: MOESM2 [file 9549326]
